# Supplementary material for: Cover trees association changed bacterial diversity in coffee production systems
Source: Research Square preprint supplement (doi:10.21203/rs.3.rs-8555286/v1), 2026-02-02
Supplement: Supplementary file 1 [file bb57a011eb7b78464d2e621c.docx]

**Cover trees association changed bacterial diversity in coffee production systems**

Marco Chávez-Tinoco **·** Carolina Senés-Guerrero **·** Rogelio Carrillo-González **·** Ma. del Carmen Angeles González-Chávez

**Table S1.** Normalized Counts of the Most Relevant Genera. Selected Based on Greatest Expression Differences, Significance, and Abundance.

| Genera | log2FoldChange | padj | baseMean |
| --- | --- | --- | --- |
| *Symploca* | -11.97 | 6.19E-21 | 9948.53 |
| Xanthobacteraceae 503485 | 11.96 | 3.29E-12 | 346.38 |
| *Achromobacter* | -21.16 | 3.87E-10 | 40.09 |
| *Lysinimonas* | -22.92 | 1.40E-09 | 40.21 |
| *Catellatospora* | -21.75 | 7.76E-09 | 18.79 |
| *Sinorhizobium* | -23.06 | 1.09E-08 | 34.16 |
| Gp1.AA122 | 19.58 | 1.80E-08 | 38.05 |
| *Angustibacter* | 18.88 | 3.79E-08 | 21.75 |
| *Burkholderia* | -26.3 | 9.08E-08 | 31.06 |
| *Granulicella* | 19.11 | 9.08E-08 | 21.15 |
| *Pseudoduganella* | -21.83 | 5.98E-07 | 13.18 |
| *Sulfotelmatobacter* | 10.68 | 3.84E-06 | 125.77 |
| *Bog.515* | 19.52 | 9.88E-06 | 32.34 |
| *Streptomyces* | 3.78 | 3.40E-05 | 373.83 |
| *VAYN01* | 14.44 | 5.21E-05 | 10.42 |
| *Binatia* | 10.52 | 7.45E-05 | 66.83 |
| *R.H.3 (Kineosporiaceae R.H.3)* | 8.38 | 1.28E-04 | 40.19 |
| *Oceanobacillus* | 18.47 | 1.54E-04 | 14.88 |
| Chitinophagaceae 929731 | 8.7 | 1.56E-04 | 44.23 |
| Chitinophagaceae 966727 | 9.1 | 1.70E-04 | 52.73 |
| *Trebonia* | 17.34 | 1.87E-04 | 43.69 |
| *Pseudoxanthomonas* | -19.94 | 5.55E-04 | 21.94 |
| *Pullulanibacillus* | 10.67 | 7.59E-04 | 287.52 |
| *Bacillus* | -26.07 | 1.03E-03 | 86.83 |
| *Phenylobacterium* | 2.56 | 1.03E-03 | 249.87 |
| *OLB14* | 9.17 | 1.32E-03 | 33.54 |
| *Gp1.AA17* | 7.18 | 1.64E-03 | 155.34 |
| *Mesobacillus* | -24.59 | 2.29E-03 | 67.2 |
| *Bacillus* | -3.52 | 3.35E-03 | 447.87 |
| *Tumebacillus* | 6.2 | 5.52E-03 | 2602.05 |
| *Micromonospora* | -22.87 | 5.67E-03 | 22.02 |
| *Streptacidiphilus* | 10.49 | 7.39E-03 | 93.72 |
| *Streptomyces* | 9.38 | 1.82E-02 | 74.65 |
| *Haliangiaceae* | 6.96 | 1.82E-02 | 18.43 |
| *KBS.96* | 5.2 | 1.82E-02 | 189.88 |
| *Streptomyces* | -20.2 | 2.11E-02 | 14.14 |
| *Rhodanobacter* | -19.57 | 2.11E-02 | 7.23 |
| *Microlunatus* | 7.32 | 2.11E-02 | 32.32 |
| *Pedobacter* | -20.05 | 2.18E-02 | 30.41 |
| *Brevundimonas* | -9.62 | 2.31E-02 | 54.03 |
| *Sporocytophaga* | 7.12 | 2.31E-02 | 5.88 |
| *UBA4765* | -19.76 | 2.38E-02 | 12.13 |

**Cover trees association changed bacterial diversity in coffee production systems**

Marco Chávez-Tinoco **·** Carolina Senés-Guerrero **·** Rogelio Carrillo-González **·** Ma. del Carmen Angeles González-Chávez

**Table S2**. More abundant genera per sample type.

| Coffee-banana  Root | Coffee-banana  Rhizosphere Soil | Coffee-mango  Root | Coffee-mango  Rhizosphere Soil | Coffee-sun  Root | Coffee-sun  Rhizosphere Soil | Banana  Root | Banana  Soil | Mango  Root | Mango  Soil |
| --- | --- | --- | --- | --- | --- | --- | --- | --- | --- |
| *Symploca* | *Neobacillus* | *Symploca* | *Neobacillus* | *Symploca* | *Neobacillus* | *Neobacillus* | *Neobacillus* | *Gottfriedia* | *Neobacillus* |
| *Neobacillus* | *Streptomyces* | *Neobacillus* | *Kurthia* | *Neobacillus* | *Tumebacillus* | *Sphingomicrobium* | *Tumebacillus* | *Neobacillus* | *Gottfriedia* |
| *Gottfriedia* | *Tumebacillus* | *Peribacillus* | *Rhodococcus* | *Tumebacillus* | *Gottfriedia* | *Streptomyces* | *Gottfriedia* | *Symploca* | *Peribacillus* |
| *Streptomyces* | *Gottfriedia* | *Streptomyces* | *Gottfriedia* | *Gottfriedia* | *Bacillus* | *Mycobacterium* | *Streptomyces* | *Caballeronia* | *Streptomyces* |
| *Micromonospora* | *Micromonospora* | *Fictibacillus* | *Streptomyces* | *Streptomyces* | *Streptomyces* | *Bradyrhizobium* | *Mycobacterium* | *Sphingomicrobium* | *Sphingomicrobium* |
| *Mycobacterium* | *Mycobacterium* | *Gottfriedia* | *Peribacillus* | *Nocardia* | *Margalitia* | *Caballeronia* | *Bradyrhizobium* | *Streptomyces* | *Kurthia* |
| *Actinoplanes* | *Sphingomicrobium* | *Mezorhizobium* | *Mezorhizobium* | *Paraburkholderia* | *Geodermatophilus* | *Micromonospora* | *Sphingomicrobium* | *Paraburkholderia* | *Bradyrhizobium* |
| *Paraburkholderia* | *Nitrosocosmicus* | *Sphingomicrobium* | *TA.21* | *Mycobacterium* | *Mycobacterium* | *Paraburkholderia* | *Paraburkholderia* | *Rhodococcus* | *Nocardioides* |
| *Sphingomicrobium* | *Actinoplanes* | *TA.21* | *Mycobacterium* | *Bradyrhizobium* | *Sphingomicrobium* | *Nocardioides* | *Caballeronia* | *Bradyrhizobium* | *Mycobacterium* |
| *Caballeronia* | *Geodermatophilus_A* | *Bacillus* | *Sphingomicrobium* | *Actinoplanes* | *Caballeronia* | *Sphingobium* | *Nocardioides* | *Pseudescherichia* | *Bacillus* |
